# Supplementary material
Source: Royal Society of Chemistry journal article supplement (doi:10.1039/d5su00947b)
Supplement: d5su00947b1.pdf [file d5su00947b1.pdf]

# Enhanced plant growth and harvestable yield through fluorescent copper-based composites

## Supporting Information

Submitted to

**RSC Sustainability**

Konstantinos T. Kotoulas,<sup>1,2,3</sup> Thomas Hinton,<sup>1</sup> Ethan Macallister,<sup>1</sup> Jai Ram,<sup>1</sup> John D. Wallis,<sup>3</sup> Yunhong Jiang,<sup>4</sup> Andrew D. Burrows,<sup>2</sup> Gareth W.V. Cave,<sup>4</sup> Ming Xie<sup>1\*</sup>

<sup>1</sup> Department of Chemical Engineering, University of Bath, Bath, BA2 7AY, United Kingdom

<sup>2</sup> Department of Chemistry, University of Bath, Bath BA2 7AY, United Kingdom

<sup>3</sup> School of Science and Technology, Nottingham Trent University, Nottingham, NG11 8NS, United Kingdom

<sup>4</sup> Department of Applied Sciences, Northumbria University, Newcastle NE1 8ST, United Kingdom

**Crystallographic dataset**

New Tetragonal Polymorph of  $C_{56}H_{60}I_4P_4Cu_4$ .

| <b>Table 1 Crystal data and structure refinement for tetragonal <math>C_{56}H_{60}I_4P_4Cu_4</math>.</b> |                                                    |
|----------------------------------------------------------------------------------------------------------|----------------------------------------------------|
| Empirical formula                                                                                        | $C_{56}H_{60}I_4P_4Cu_4$                           |
| Formula weight                                                                                           | 1618.68                                            |
| Temperature/K                                                                                            | 140                                                |
| Crystal system                                                                                           | Tetragonal                                         |
| Space group                                                                                              | I-4                                                |
| a/Å                                                                                                      | 16.6953(2)                                         |
| b/Å                                                                                                      | 16.6953(2)                                         |
| c/Å                                                                                                      | 10.2819(2)                                         |
| $\alpha/^\circ$                                                                                          | 90                                                 |
| $\beta/^\circ$                                                                                           | 90                                                 |
| $\gamma/^\circ$                                                                                          | 90                                                 |
| Volume/Å <sup>3</sup>                                                                                    | 2865.91(9)                                         |
| Z                                                                                                        | 2                                                  |
| $\rho_{calc}/cm^3$                                                                                       | 1.876                                              |
| $\mu/mm^{-1}$                                                                                            | 3.766                                              |
| F(000)                                                                                                   | 1568                                               |
| Crystal size/mm <sup>3</sup>                                                                             | 0.44 × 0.24 × 0.16                                 |
| Radiation                                                                                                | MoK $\alpha$ ( $\lambda = 0.71073$ )               |
| 2 $\theta$ range for data collection/ $^\circ$                                                           | 4.652 to 61.12                                     |
| Index ranges                                                                                             | -20 ≤ h ≤ 20, -16 ≤ k ≤ 21, -13 ≤ l ≤ 12           |
| Reflections collected                                                                                    | 10170                                              |
| Independent reflections                                                                                  | 3466 [ $R_{int} = 0.0493$ , $R_{sigma} = 0.0438$ ] |
| Data/restraints/parameters                                                                               | 3466/0/155                                         |
| Goodness-of-fit on F <sup>2</sup>                                                                        | 1.123                                              |
| Final R indexes [ $I \geq 2\sigma(I)$ ]                                                                  | $R_1 = 0.0375$ , $wR_2 = 0.0904$                   |
| Final R indexes [all data]                                                                               | $R_1 = 0.0385$ , $wR_2 = 0.0908$                   |
| Largest diff. peak/hole / e Å <sup>-3</sup>                                                              | 1.36/-1.23                                         |
| Flack parameter                                                                                          | 0.02(2)                                            |
| CCDC deposition number                                                                                   | 2501638                                            |

| <b>Table 2 Fractional Atomic Coordinates (<math>\times 10^4</math>) and Equivalent Isotropic Displacement Parameters (<math>\text{Å}^2 \times 10^3</math>) for tetragonal <math>C_{56}H_{60}I_4P_4Cu_4</math>. <math>U_{eq}</math> is defined as 1/3 of the trace of the orthogonalised <math>U_{ij}</math> tensor.</b> |            |            |            |           |
|-------------------------------------------------------------------------------------------------------------------------------------------------------------------------------------------------------------------------------------------------------------------------------------------------------------------------|------------|------------|------------|-----------|
| Atom                                                                                                                                                                                                                                                                                                                    | X          | Y          | Z          | U(eq)     |
| I1                                                                                                                                                                                                                                                                                                                      | 5858.7(3)  | 9122.6(3)  | 972.8(4)   | 19.16(13) |
| Cu1                                                                                                                                                                                                                                                                                                                     | 5694.0(6)  | 9237.1(7)  | 3558.3(10) | 27.3(2)   |
| P1                                                                                                                                                                                                                                                                                                                      | 6496.0(13) | 8401.8(12) | 4668.6(19) | 21.6(4)   |
| C1                                                                                                                                                                                                                                                                                                                      | 6396(5)    | 7332(5)    | 4365(8)    | 21.5(15)  |
| C2                                                                                                                                                                                                                                                                                                                      | 6401(6)    | 6733(7)    | 5350(10)   | 37(2)     |
| C3                                                                                                                                                                                                                                                                                                                      | 6431(7)    | 5926(6)    | 5011(11)   | 43(2)     |
| C4                                                                                                                                                                                                                                                                                                                      | 6414(6)    | 5700(6)    | 3738(10)   | 37(2)     |
| C5                                                                                                                                                                                                                                                                                                                      | 6401(6)    | 6282(6)    | 2767(9)    | 35(2)     |
| C6                                                                                                                                                                                                                                                                                                                      | 6379(6)    | 7065(6)    | 3082(9)    | 32.2(19)  |

|     |          |         |          |          |
|-----|----------|---------|----------|----------|
| C7  | 7565(4)  | 8532(5) | 4323(7)  | 20.9(15) |
| C8  | 7816(5)  | 9248(5) | 3784(9)  | 28.4(18) |
| C9  | 8627(6)  | 9373(6) | 3582(10) | 34(2)    |
| C10 | 9184(5)  | 8776(6) | 3878(9)  | 32.2(19) |
| C11 | 8925(6)  | 8063(6) | 4366(9)  | 34(2)    |
| C12 | 8115(5)  | 7929(6) | 4596(8)  | 28.7(18) |
| C13 | 6444(6)  | 8494(6) | 6451(9)  | 34.5(19) |
| C14 | 6486(10) | 9307(9) | 6963(13) | 64(4)    |

**Table 3 Anisotropic Displacement Parameters ( $\text{\AA}^2 \times 10^3$ ) for tetragonal  $\text{C}_{56}\text{H}_{60}\text{I}_4\text{P}_4\text{Cu}_4$ . The Anisotropic displacement factor exponent takes the form: -  $2\pi^2[h^2a^*U_{11}+2hka^*b^*U_{12}+\dots]$ .**

| Atom | U <sub>11</sub> | U <sub>22</sub> | U <sub>33</sub> | U <sub>23</sub> | U <sub>13</sub> | U <sub>12</sub> |
|------|-----------------|-----------------|-----------------|-----------------|-----------------|-----------------|
| I1   | 19.5(3)         | 15.2(2)         | 22.8(2)         | -1.23(18)       | 1.91(18)        | 1.24(16)        |
| Cu1  | 21.5(5)         | 30.3(6)         | 29.9(5)         | -0.5(4)         | -1.2(4)         | 8.9(3)          |
| P1   | 20.4(10)        | 25.7(11)        | 18.7(9)         | -3.0(7)         | -0.3(7)         | 6.4(7)          |
| C1   | 19(4)           | 27(4)           | 19(4)           | -3(3)           | 2(3)            | 4(3)            |
| C2   | 45(6)           | 44(6)           | 24(5)           | 3(4)            | 5(4)            | 5(4)            |
| C3   | 65(7)           | 30(5)           | 34(5)           | 14(4)           | -6(5)           | -6(4)           |
| C4   | 50(6)           | 25(4)           | 35(6)           | 4(4)            | -4(4)           | -5(4)           |
| C5   | 42(5)           | 39(5)           | 24(4)           | -6(4)           | -5(4)           | -2(4)           |
| C6   | 38(5)           | 38(5)           | 21(4)           | 3(4)            | -4(4)           | 0(4)            |
| C7   | 18(4)           | 26(4)           | 19(4)           | -3(3)           | 0(3)            | 1(3)            |
| C8   | 32(4)           | 24(4)           | 28(5)           | 1(3)            | 3(3)            | -4(3)           |
| C9   | 33(5)           | 36(5)           | 33(5)           | -2(4)           | 3(4)            | -10(4)          |
| C10  | 21(4)           | 48(5)           | 28(5)           | -6(4)           | 4(3)            | -8(3)           |
| C11  | 33(5)           | 41(5)           | 26(4)           | -5(4)           | -2(3)           | 9(4)            |
| C12  | 28(5)           | 35(5)           | 23(4)           | 3(3)            | 0(3)            | 7(3)            |
| C13  | 32(5)           | 47(6)           | 24(4)           | -4(4)           | 3(4)            | 10(4)           |
| C14  | 85(11)          | 74(9)           | 34(6)           | -10(6)          | 3(6)            | -6(7)           |

**Table 4 Bond Lengths for tetragonal  $\text{C}_{56}\text{H}_{60}\text{I}_4\text{P}_4\text{Cu}_4$**

| Atom | Atom             | Length/ $\text{\AA}$ | Atom | Atom | Length/ $\text{\AA}$ |
|------|------------------|----------------------|------|------|----------------------|
| I1   | Cu1 <sup>1</sup> | 2.6722(11)           | C3   | C4   | 1.362(15)            |
| I1   | Cu1              | 2.6794(11)           | C4   | C5   | 1.393(14)            |
| I1   | Cu1 <sup>2</sup> | 2.7669(12)           | C5   | C6   | 1.349(14)            |
| Cu1  | P1               | 2.245(2)             | C7   | C8   | 1.382(11)            |
| P1   | C1               | 1.820(8)             | C7   | C12  | 1.392(11)            |
| P1   | C7               | 1.832(8)             | C8   | C9   | 1.387(13)            |
| P1   | C13              | 1.841(9)             | C9   | C10  | 1.396(14)            |
| C1   | C2               | 1.424(13)            | C10  | C11  | 1.362(14)            |
| C1   | C6               | 1.393(12)            | C11  | C12  | 1.391(13)            |
| C2   | C3               | 1.392(15)            | C13  | C14  | 1.458(16)            |

<sup>1</sup>3/2-Y, 1/2+X, 1/2-Z; <sup>2</sup>-1/2+Y, 3/2-X, 1/2-Z

**Table 5 Bond Angles for tetragonal  $\text{C}_{56}\text{H}_{60}\text{I}_4\text{P}_4\text{Cu}_4$**

| Atom             | Atom | Atom             | Angle/°   |  | Atom | Atom | Atom | Angle/°  |
|------------------|------|------------------|-----------|--|------|------|------|----------|
| Cu1 <sup>1</sup> | I1   | Cu1              | 75.22(4)  |  | C6   | C1   | P1   | 118.6(7) |
| Cu1 <sup>1</sup> | I1   | Cu1 <sup>2</sup> | 78.55(3)  |  | C6   | C1   | C2   | 116.7(8) |
| Cu1              | I1   | Cu1 <sup>2</sup> | 73.67(3)  |  | C3   | C2   | C1   | 120.2(9) |
| I1 <sup>2</sup>  | Cu1  | I1 <sup>1</sup>  | 97.80(3)  |  | C4   | C3   | C2   | 120.5(9) |
| I1               | Cu1  | I1 <sup>1</sup>  | 103.37(4) |  | C3   | C4   | C5   | 119.8(9) |
| I1 <sup>2</sup>  | Cu1  | I1               | 105.99(4) |  | C6   | C5   | C4   | 120.2(9) |
| P1               | Cu1  | I1 <sup>1</sup>  | 116.95(7) |  | C5   | C6   | C1   | 122.5(9) |
| P1               | Cu1  | I1               | 113.51(6) |  | C8   | C7   | P1   | 118.4(6) |
| P1               | Cu1  | I1 <sup>2</sup>  | 117.17(7) |  | C8   | C7   | C12  | 120.4(8) |
| C1               | P1   | Cu1              | 117.9(3)  |  | C12  | C7   | P1   | 121.2(6) |
| C1               | P1   | C7               | 99.9(3)   |  | C7   | C8   | C9   | 119.1(8) |
| C1               | P1   | C13              | 104.4(4)  |  | C8   | C9   | C10  | 120.7(8) |
| C7               | P1   | Cu1              | 114.1(3)  |  | C11  | C10  | C9   | 119.5(8) |
| C7               | P1   | C13              | 103.2(4)  |  | C10  | C11  | C12  | 120.8(9) |
| C13              | P1   | Cu1              | 115.2(3)  |  | C11  | C12  | C7   | 119.4(8) |
| C2               | C1   | P1               | 124.6(7)  |  | C14  | C13  | P1   | 115.8(8) |

<sup>1</sup>3/2-Y, 1/2+X, 1/2-Z; <sup>2</sup>-1/2+Y, 3/2-X, 1/2-Z

| Table 6 Torsion Angles for tetragonal C <sub>56</sub> H <sub>60</sub> I <sub>4</sub> P <sub>4</sub> Cu <sub>4</sub> |    |     |     |           |  |     |     |     |     |           |
|---------------------------------------------------------------------------------------------------------------------|----|-----|-----|-----------|--|-----|-----|-----|-----|-----------|
| A                                                                                                                   | B  | C   | D   | Angle/°   |  | A   | B   | C   | D   | Angle/°   |
| Cu1                                                                                                                 | P1 | C1  | C2  | -137.4(7) |  | C4  | C5  | C6  | C1  | 2.2(15)   |
| Cu1                                                                                                                 | P1 | C1  | C6  | 48.1(8)   |  | C6  | C1  | C2  | C3  | 3.4(14)   |
| Cu1                                                                                                                 | P1 | C7  | C8  | 20.0(7)   |  | C7  | P1  | C1  | C2  | 98.4(8)   |
| Cu1                                                                                                                 | P1 | C7  | C12 | -160.1(6) |  | C7  | P1  | C1  | C6  | -76.1(7)  |
| Cu1                                                                                                                 | P1 | C13 | C14 | -47.4(10) |  | C7  | P1  | C13 | C14 | 0)        |
| P1                                                                                                                  | C1 | C2  | C3  | -171.2(8) |  | C7  | C8  | C9  | C10 | 2.1(14)   |
| P1                                                                                                                  | C1 | C6  | C5  | 172.1(8)  |  | C8  | C7  | C12 | C11 | 2.3(12)   |
| P1                                                                                                                  | C7 | C8  | C9  | 176.5(7)  |  | C8  | C9  | C10 | C11 | 0.2(14)   |
| P1                                                                                                                  | C7 | C12 | C11 | -177.5(7) |  | C9  | C10 | C11 | C12 | -1.3(14)  |
| C1                                                                                                                  | P1 | C7  | C8  | 146.8(7)  |  | C10 | C11 | C12 | C7  | 0.0(13)   |
| C1                                                                                                                  | P1 | C7  | C12 | -33.3(7)  |  | C12 | C7  | C8  | C9  | -3.3(13)  |
| C1                                                                                                                  | P1 | C13 | C14 | -178.2(9) |  | C13 | P1  | C1  | C2  | -8.1(8)   |
| C1                                                                                                                  | C2 | C3  | C4  | -3.5(17)  |  | C13 | P1  | C1  | C6  | 177.4(7)  |
| C2                                                                                                                  | C1 | C6  | C5  | -2.8(14)  |  | C13 | P1  | C7  | C8  | -105.7(7) |
| C2                                                                                                                  | C3 | C4  | C5  | 2.8(17)   |  | C13 | P1  | C7  | C12 | 74.1(8)   |
| C3                                                                                                                  | C4 | C5  | C6  | -2.1(16)  |  |     |     |     |     |           |

| Table 7 Hydrogen Atom Coordinates (Å×10 <sup>4</sup> ) and Isotropic Displacement Parameters (Å <sup>2</sup> ×10 <sup>3</sup> ) for tetragonal C <sub>56</sub> H <sub>60</sub> I <sub>4</sub> P <sub>4</sub> Cu <sub>4</sub> |         |         |         |       |
|------------------------------------------------------------------------------------------------------------------------------------------------------------------------------------------------------------------------------|---------|---------|---------|-------|
| Atom                                                                                                                                                                                                                         | X       | Y       | Z       | U(eq) |
| H2                                                                                                                                                                                                                           | 6382.81 | 6883.57 | 6240.71 | 45    |
| H3                                                                                                                                                                                                                           | 6464.38 | 5530.08 | 5672.75 | 52    |
| H4                                                                                                                                                                                                                           | 6411.62 | 5148.26 | 3514.25 | 44    |
| H5                                                                                                                                                                                                                           | 6407.13 | 6125.34 | 1878.2  | 42    |
| H6                                                                                                                                                                                                                           | 6351.27 | 7450.23 | 2403.29 | 39    |

|             |         |         |         |    |
|-------------|---------|---------|---------|----|
| <b>H8</b>   | 7437.02 | 9648.66 | 3555.05 | 34 |
| <b>H9</b>   | 8806.36 | 9869.92 | 3238.2  | 41 |
| <b>H10</b>  | 9739.15 | 8866.57 | 3739.41 | 39 |
| <b>H11</b>  | 9302    | 7652.8  | 4551.09 | 40 |
| <b>H12</b>  | 7939.3  | 7430.49 | 4936.09 | 34 |
| <b>H13A</b> | 5936.57 | 8248.46 | 6749.26 | 41 |
| <b>H13B</b> | 6888.65 | 8179.82 | 6831.86 | 41 |
| <b>H14A</b> | 7007.74 | 9541.65 | 6750.52 | 97 |
| <b>H14B</b> | 6417.88 | 9294.63 | 7909.97 | 97 |
| <b>H14C</b> | 6059.67 | 9632.42 | 6574.53 | 97 |

The tetragonal polymorph crystallised from chloroform/ether as large colourless blocks, in contrast to the known orthorhombic polymorph<sup>1</sup> which produced much smaller crystals from the same solvent system. The space group is I-4, and only one quarter of the molecular structure of the functionalised Cu<sub>4</sub>I<sub>4</sub> cube is crystallographically unique, since it lies on a four-fold rotoinversion axis. The Cu-I bond lengths (2.6722(11), 2.6794(11) and 2.7669(12) Å) and I-Cu-I angles (97.80(3), 103.37(4) and 105.99(4)°) are very similar to those observed in the orthorhombic polymorph where half the molecule is crystallographically unique (2.678-2.721 Å, 98.03 & 98.62, 103.88, 106.51, 107.20 & 107.31°). The Cu-I-Cu angles (73.67(3), 75.22(4) & 78.55(3)°) are also similar to those in the orthorhombic polymorph (71.91-77.34°).

For the triphenyl phosphine complex, the data recorded corresponds to the monoclinic polymorph of this substance which has been reported in the Cambridge Structural Database a number of times as refcodes: DEWJUK, DEWJUK8-DEWJUK17 and DEWJUK20. There is also a cubic polymorph which has been reported (DEWJUK1-DEWJUK7, DEWJUK18-DEWJUK19, DEWJUK21-DEWJUK28).

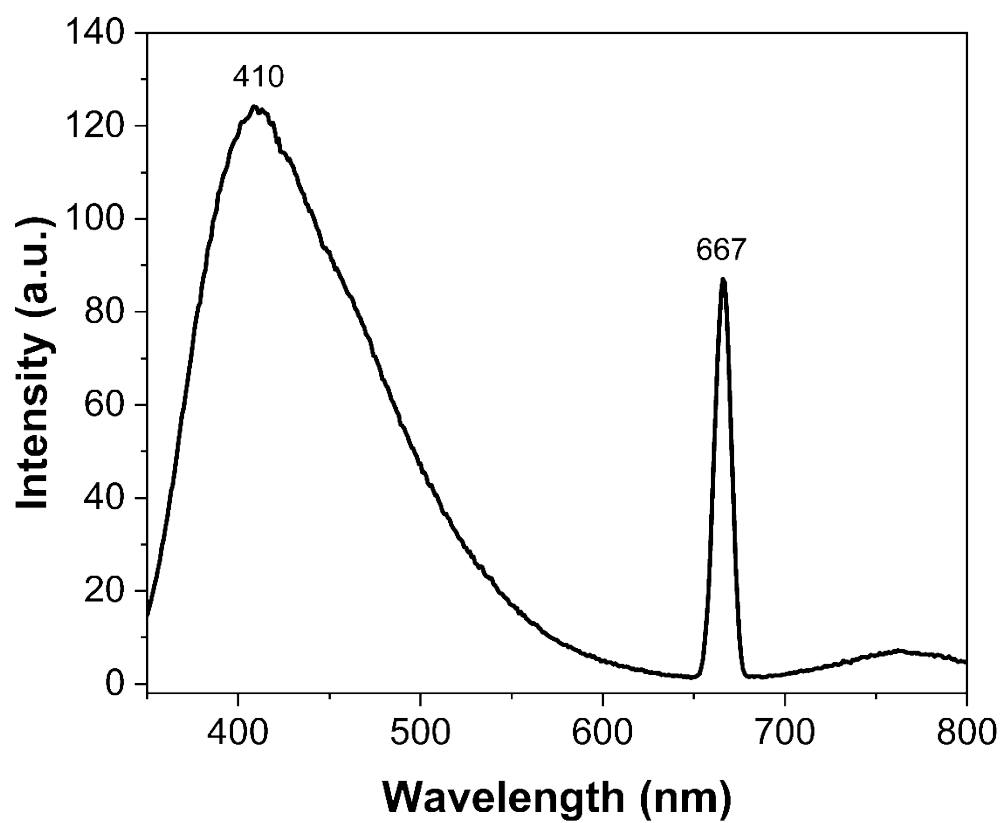

**Supplementary Figure 1.** Fluorescence emission spectrum of Cu-CNAS in solution at 333nm excitation.

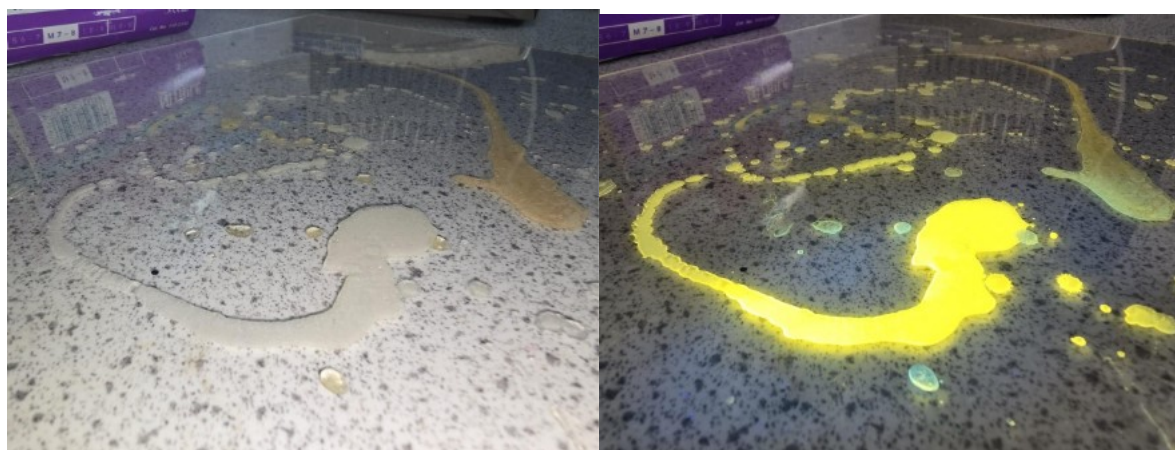

**Supplementary Figure 2.** Photographs of solid samples of [Cu<sub>4</sub>I<sub>4</sub>(PPh<sub>2</sub>Et)<sub>4</sub>] (left) and their emission under 365 nm UV excitation (right).

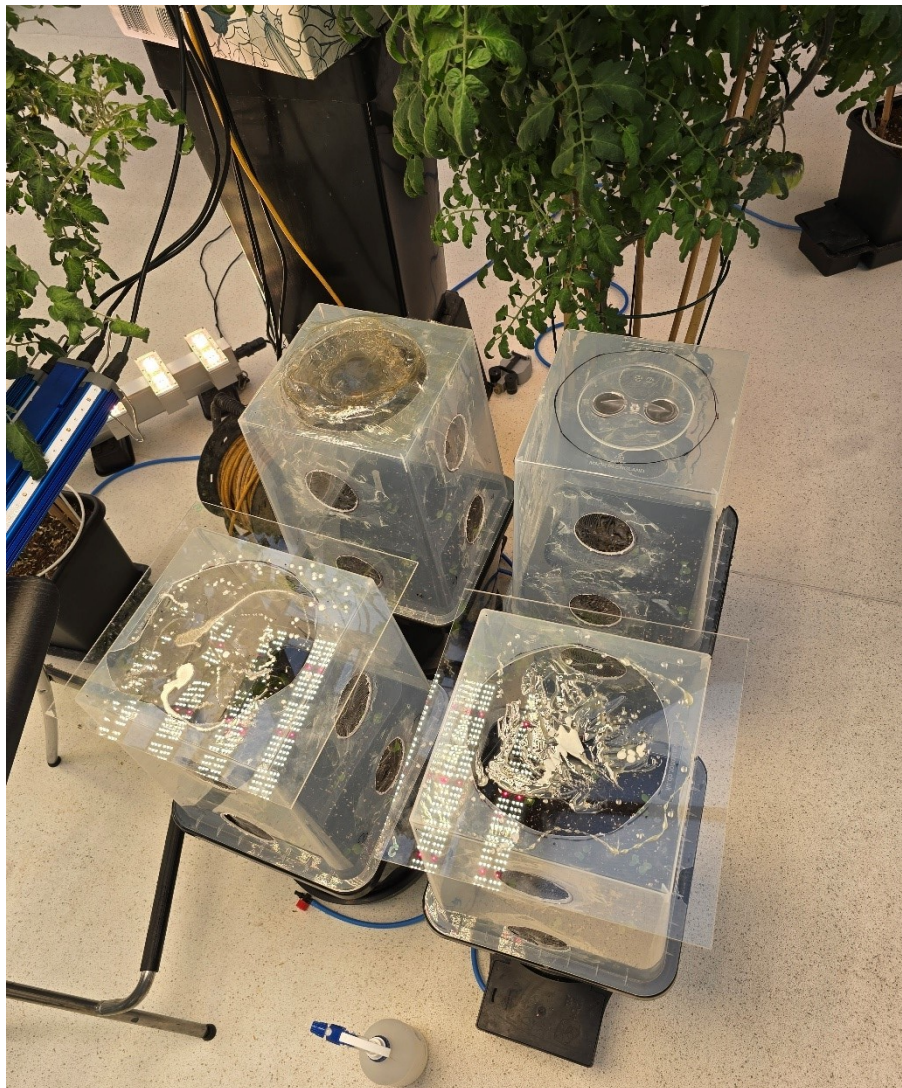

**Supplementary Figure 3.** Indirect trial setup at AutoPotUK. Back left is the modified chamber using CA/Cu-CNA, back right is the control using the original Autopot polypropylene chamber, front left is the  $[\text{Cu}_4\text{I}_4(\text{PPh}_2\text{Et})_4]$  coating and front right is the  $[\text{Cu}_4\text{I}_4(\text{PPh}_3)_4]$  coating.

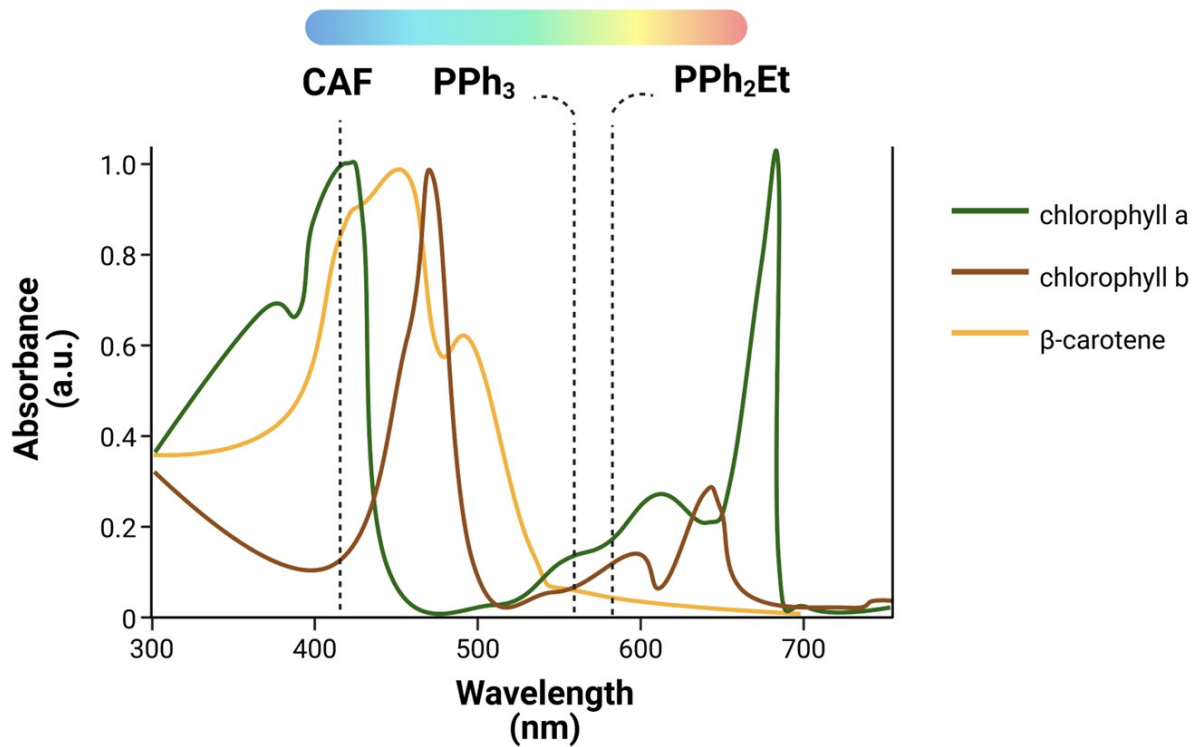

**Supplementary Figure 4.** Spectral overlap between copper-based composite emission maxima and photosynthetic pigment absorption profiles. Vertical dashed lines indicate the peak emission wavelengths for the developed spectral-converting materials: CAF (410 nm), PPh<sub>3</sub> (570 nm), and PPh<sub>2</sub>Et (585 nm).

Chlorophyll and Carotenoid quantification, adapted from Patricio et al.<sup>1</sup>

$$\text{Eq.1} \quad \text{Chlorophyll A} \left( \frac{\text{mg}}{\text{L}} \right) = 12.7 \times OD_{663} - 2.69 \times OD_{645}$$

$$\text{Eq.2} \quad \text{Chlorophyll B} \left( \frac{\text{mg}}{\text{L}} \right) = 22.9 \times OD_{645} - 4.86 \times OD_{663}$$

$$\text{Eq.3} \quad \text{Total Chlorophyll} \left( \frac{\text{mg}}{\text{L}} \right) = 8.02 \times OD_{663} + 20.20 \times OD_{645}$$

$$\text{Eq.4} \quad \text{Carotenoids} \left( \frac{\text{mg}}{\text{L}} \right) = 4.7 \times OD_{440} - 0.27 \times (\text{Total Chlorophyll})$$

## References

1. M. Pérez-Patricio, J. Camas-Anzueto, A. Sanchez-Alegría, A. Aguilar-González, F. Gutiérrez-Miceli, E. Escobar-Gómez, Y. Voisin, C. Rios-Rojas and R. Grajales-Coutiño, *Sensors*, 2018, **18**, 650.DOI:10.3390/s18020650.
